# Supplementary material for: Tetra- and dinuclear manganese complexes of xanthene-bridged O,N,O-Schiff bases with 3-hydroxypropyl or 2-hydroxybenzyl groups: ligand substitution at a triply bridging site
Source: Royal Society of Chemistry journal article supplement (doi:10.1039/c9dt03007g), 2019-01-01
Supplement: c9dt03007g1.pdf [file c9dt03007g1.pdf]

**Tetra- and dinuclear manganese complexes of xanthene-bridged O,N,O-Schiff bases with 3-hydroxypropyl or 2-hydroxybenzyl groups: ligand substitution at a triply bridging site**

Rina Ogawa,<sup>a</sup> Takayoshi Suzuki,<sup>a,d</sup> Masakazu Hirotsu,<sup>\*b</sup> Noriyuki Nishi,<sup>c</sup> Yuu Shimizu,<sup>c</sup> Yukinari Sunatsuki,<sup>a</sup> Yoshio Teki,<sup>c</sup> and Isamu Kinoshita<sup>c</sup>

<sup>a</sup> Department of Chemistry, Faculty of Science, Okayama University, Okayama 700-8530, Japan.

<sup>b</sup> Department of Chemistry, Faculty of Science, Kanagawa University, 2946 Tsuchiya, Hiratsuka, Kanagawa 259-1293, Japan.

<sup>c</sup> Division of Molecular Materials Science, Graduate School of Science, Osaka City University, 3-3-138 Sugimoto, Sumiyoshi-ku, Osaka 558-8585, Japan.

<sup>d</sup> Research Institute for Interdisciplinary Science, Okayama University, Okayama 700-8530, Japan.

\*Corresponding author. Tel.: +81 463 59 4111; Fax: +81 463 58 9684; e-mail: mhiro@kanagawa-u.ac.jp

**Table S1.** Crystallographic data for [3](ClO<sub>4</sub>)<sub>2</sub>, [4]BF<sub>4</sub>, and 5

|                                                     | [3](ClO <sub>4</sub> ) <sub>2</sub> ·2Pr <sub>2</sub> O·5H <sub>2</sub> O                       | [4]BF <sub>4</sub> ·2CH <sub>2</sub> Cl <sub>2</sub> ·H <sub>2</sub> O                                         | 5·2.6C <sub>7</sub> H <sub>8</sub> ·4.7H <sub>2</sub> O                                  |
|-----------------------------------------------------|-------------------------------------------------------------------------------------------------|----------------------------------------------------------------------------------------------------------------|------------------------------------------------------------------------------------------|
| Empirical formula                                   | C <sub>82</sub> H <sub>106</sub> Cl <sub>2</sub> Mn <sub>2</sub> N <sub>4</sub> O <sub>25</sub> | C <sub>76</sub> H <sub>77</sub> BCl <sub>4</sub> F <sub>4</sub> Mn <sub>4</sub> N <sub>4</sub> O <sub>16</sub> | C <sub>104.20</sub> H <sub>94.20</sub> Mn <sub>2</sub> N <sub>4</sub> O <sub>14.70</sub> |
| Formula weight                                      | 1728.53                                                                                         | 1750.78                                                                                                        | 1747.51                                                                                  |
| Temperature/K                                       | 188                                                                                             | 123                                                                                                            | 133                                                                                      |
| Wavelength/Å                                        | 0.7107                                                                                          | 0.7107                                                                                                         | 0.7107                                                                                   |
| Crystal system                                      | triclinic                                                                                       | monoclinic                                                                                                     | tetragonal                                                                               |
| Space group                                         | <i>P</i> $\bar{1}$                                                                              | <i>P</i> 2 <sub>1</sub>                                                                                        | <i>P</i> 4/ <i>n</i>                                                                     |
| <i>a</i> /Å                                         | 11.0476(15)                                                                                     | 13.2444(13)                                                                                                    | 27.3689(9)                                                                               |
| <i>b</i> /Å                                         | 13.524(2)                                                                                       | 17.0667(17)                                                                                                    | 27.3689(9)                                                                               |
| <i>c</i> /Å                                         | 15.220(3)                                                                                       | 16.6189(17)                                                                                                    | 12.0350(5)                                                                               |
| <i>α</i> /°                                         | 103.322(6)                                                                                      | 90                                                                                                             | 90                                                                                       |
| <i>β</i> /°                                         | 92.830(5)                                                                                       | 91.476(3)                                                                                                      | 90                                                                                       |
| <i>γ</i> /°                                         | 105.832(4)                                                                                      | 90                                                                                                             | 90                                                                                       |
| <i>V</i> /Å <sup>3</sup>                            | 2113.5(6)                                                                                       | 3755.3(7)                                                                                                      | 9014.9(7)                                                                                |
| <i>Z</i>                                            | 1                                                                                               | 2                                                                                                              | 4                                                                                        |
| <i>D</i> <sub>calcd</sub> /Mg·m <sup>-3</sup>       | 1.358                                                                                           | 1.548                                                                                                          | 1.288                                                                                    |
| <i>μ</i> (Mo Kα)/mm <sup>-1</sup>                   | 0.440                                                                                           | 0.880                                                                                                          | 0.348                                                                                    |
| <i>F</i> (000)                                      | 910                                                                                             | 1796                                                                                                           | 3660                                                                                     |
| Crystal size/mm <sup>3</sup>                        | 0.30 × 0.20 × 0.10                                                                              | 0.24 × 0.21 × 0.06                                                                                             | 0.21 × 0.17 × 0.14                                                                       |
| Reflections collected                               | 20828                                                                                           | 36416                                                                                                          | 97041                                                                                    |
| Independent reflections                             | 9616 ( <i>R</i> <sub>int</sub> = 0.0797)                                                        | 16171 ( <i>R</i> <sub>int</sub> = 0.0469)                                                                      | 10238 ( <i>R</i> <sub>int</sub> = 0.0487)                                                |
| Completeness to <i>θ</i>                            | 99.1% ( <i>θ</i> = 27.48°)                                                                      | 98.3% ( <i>θ</i> = 27.48°)                                                                                     | 99.1% ( <i>θ</i> = 27.46°)                                                               |
| Max. and min. transmission                          | 0.957 and 0.331                                                                                 | 1.0000 and 0.8290                                                                                              | 1.0000 and 0.9230                                                                        |
| No. of data/restraints/parameters                   | 9616/6/566                                                                                      | 16171/1/1043                                                                                                   | 10238/15/590                                                                             |
| Goodness of fit on <i>F</i> <sup>2</sup>            | 1.052                                                                                           | 1.031                                                                                                          | 1.107                                                                                    |
| Final <i>R</i> indices [ <i>I</i> > 2σ( <i>I</i> )] | <i>R</i> 1 = 0.0899                                                                             | <i>R</i> 1 = 0.0707                                                                                            | <i>R</i> 1 = 0.0685                                                                      |
| <i>R</i> indices (all data)                         | w <i>R</i> 2 = 0.2755                                                                           | w <i>R</i> 2 = 0.1913                                                                                          | w <i>R</i> 2 = 0.2002                                                                    |
| Absolute structure parameter                        |                                                                                                 | 0.480(11)                                                                                                      |                                                                                          |
| Largest diff. peak and hole (e·Å <sup>-3</sup> )    | 0.74 and -0.58                                                                                  | 0.963 and -0.730                                                                                               | 1.128 and -0.426                                                                         |

**Table S2.** Selected bond distances/Å and angles/° for [3](ClO<sub>4</sub>)<sub>2</sub>

|                  |            |                   |            |
|------------------|------------|-------------------|------------|
| Mn(1)–O(1)       | 2.236(3)   | Mn(1)–O(4)        | 2.305(3)   |
| Mn(1)–O(2)       | 1.857(3)   | Mn(1)–O(4)*       | 1.927(3)   |
| Mn(1)–N(1)       | 2.024(4)   | Mn(1)–N(2)*       | 2.043(4)   |
| Mn(1)–Mn(1)*     | 3.3269(13) |                   |            |
| O(1)–Mn(1)–O(2)  | 97.34(14)  | O(1)–Mn(1)–O(4)   | 165.82(12) |
| O(1)–Mn(1)–O(4)* | 90.35(13)  | O(1)–Mn(1)–N(1)   | 82.48(15)  |
| O(1)–Mn(1)–N(2)* | 92.50(15)  | O(2)–Mn(1)–O(4)   | 95.83(14)  |
| O(2)–Mn(1)–O(4)* | 171.98(15) | O(2)–Mn(1)–N(1)   | 89.78(15)  |
| O(2)–Mn(1)–N(2)* | 90.28(15)  | O(4)–Mn(1)–O(4)*  | 76.74(13)  |
| O(4)–Mn(1)–N(1)  | 92.36(15)  | O(4)–Mn(1)–N(2)*  | 92.66(15)  |
| O(4)*–Mn(1)–N(1) | 93.50(15)  | O(4)*–Mn(1)–N(2)* | 87.09(15)  |
| N(1)–Mn(1)–N(2)* | 174.94(17) | Mn(1)–O(4)–Mn(1)* | 103.26(13) |
| Mn(1)–O(4)–C(30) | 123.8(3)   | Mn(1)*–O(4)–C(30) | 120.9(3)   |

**Table S3.** Selected bond distances/Å and angles/° for 5

|                  |            |                   |            |
|------------------|------------|-------------------|------------|
| Mn(1)–O(1)       | 1.8991(19) | Mn(1)–O(3)*       | 1.8941(19) |
| Mn(1)–O(2)       | 1.8862(18) | Mn(1)–O(4)*       | 1.8813(19) |
| Mn(1)–N(1)       | 1.999(2)   | Mn(1)–N(2)*       | 1.991(2)   |
| Mn(1)–Mn(1)*     | 8.1499(8)  |                   |            |
| O(1)–Mn(1)–O(2)  | 178.78(8)  | O(1)–Mn(1)–O(3)*  | 88.07(8)   |
| O(1)–Mn(1)–O(4)* | 88.88(8)   | O(1)–Mn(1)–N(1)   | 89.69(8)   |
| O(1)–Mn(1)–N(2)* | 91.60(8)   | O(2)–Mn(1)–O(3)*  | 90.92(8)   |
| O(2)–Mn(1)–O(4)* | 92.13(8)   | O(2)–Mn(1)–N(1)   | 90.97(8)   |
| O(2)–Mn(1)–N(2)* | 87.71(8)   | O(3)*–Mn(1)–O(4)* | 176.91(8)  |
| O(3)*–Mn(1)–N(1) | 89.29(9)   | O(3)*–Mn(1)–N(2)* | 89.41(9)   |
| O(4)*–Mn(1)–N(1) | 90.24(9)   | O(4)*–Mn(1)–N(2)* | 91.14(9)   |
| N(1)–Mn(1)–N(2)* | 178.13(9)  |                   |            |

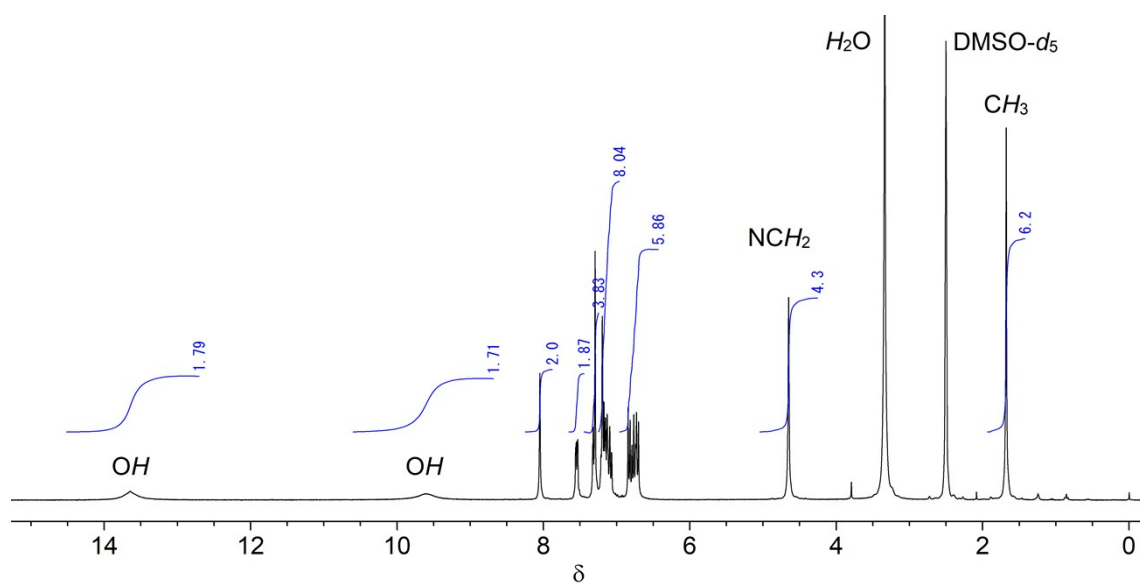

**Fig. S1.**  $^1\text{H}$  NMR (300 MHz,  $\text{DMSO-}d_6$ ) spectrum of  $\text{H}_4\text{L}^2$ .

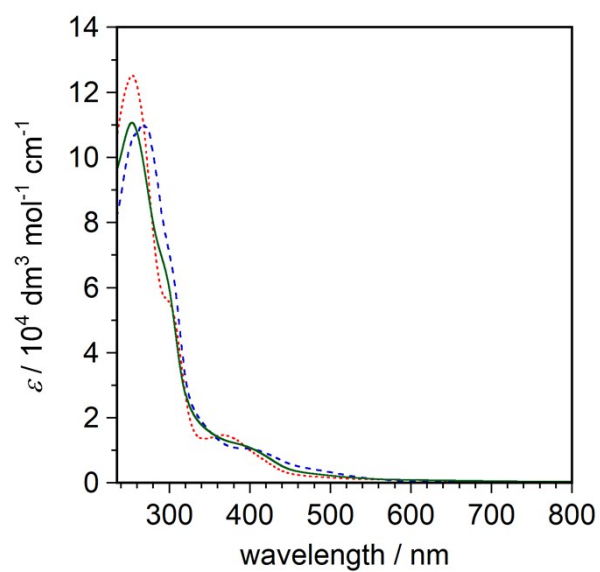

**Fig. S2.** Absorption spectra of tetramanganese complexes **1** (.....), **2** (- - -), and  $[\mathbf{4}]\text{BF}_4$  (—) in dichloromethane.

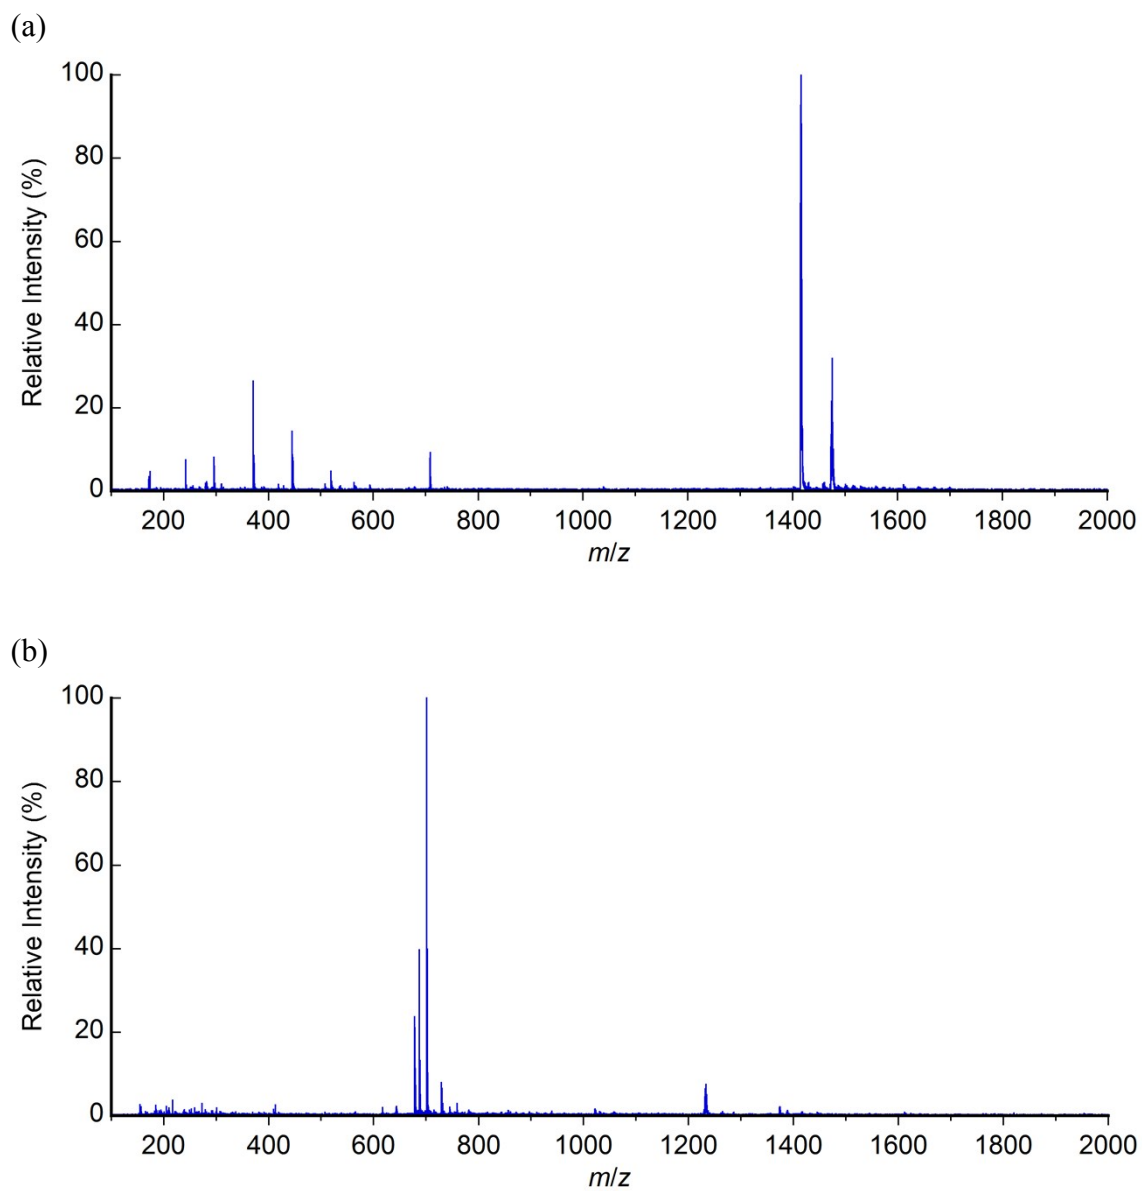

**Fig. S3.** ESI mass spectra of [4](BF<sub>4</sub>) in (a) dichloromethane and (b) methanol.

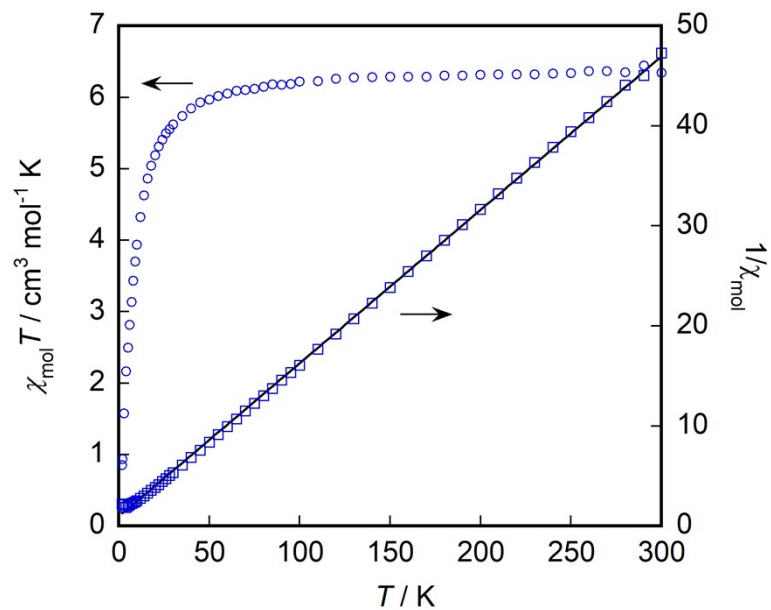

**Fig. S4.** Temperature dependence of  $\chi T$  and  $1/\chi$  for  $[3](\text{ClO}_4)_2$ . Solid lines represent the least-squares fits of the data to the model described in the text.

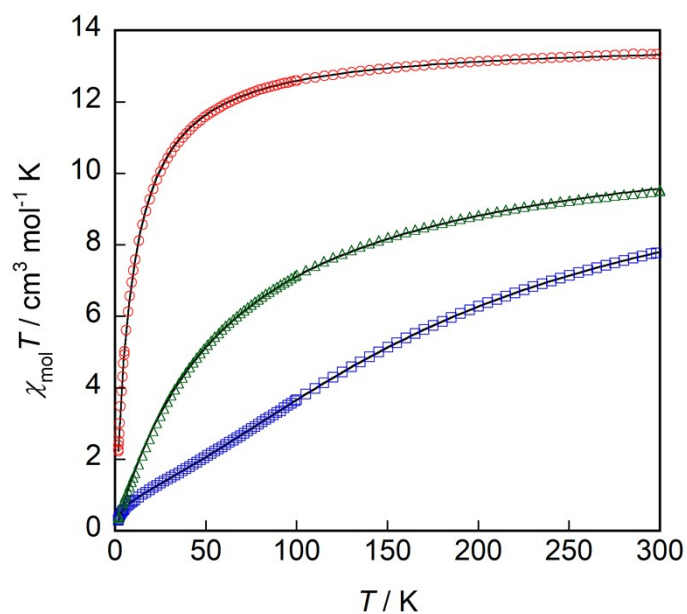

**Fig. S5.** Temperature dependence of  $\chi T$  for **1** ( $\circ$ ), **2** ( $\square$ ), and  $[4](\text{BF}_4)$  ( $\triangle$ ). Solid lines represent the least-squares fits of the data to the model described in the text.

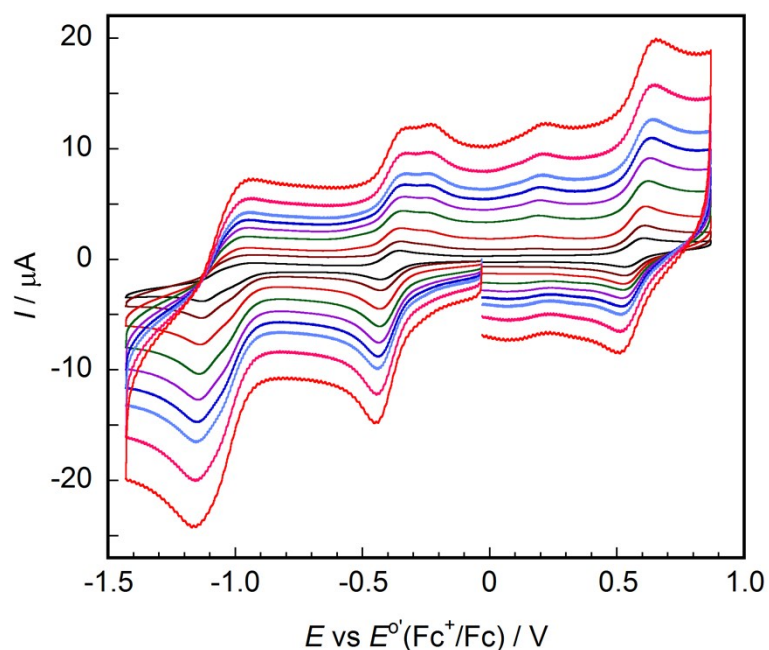

**Fig. S6.** Cyclic voltammograms of [4]PF<sub>6</sub> ( $2.3 \times 10^{-4}$  M) in CH<sub>2</sub>Cl<sub>2</sub> containing 0.1 M Bu<sub>4</sub>NPF<sub>6</sub>: scan rate, 20 (black), 50 (dark brown), 100 (red brown), 200 (green), 300 (purple), 400 (blue), 500 (light blue), 700 (pink), 1000 (red) mV s<sup>-1</sup>; working electrode, glassy carbon; auxiliary electrode, platinum wire; reference electrode, Ag/Ag<sup>+</sup>. Potentials are versus ferrocenium/ferrocene (Fc<sup>+</sup>/Fc).

### Reference

- 1) M. Hirotsu, Y. Shimizu, N. Kuwamura, R. Tanaka, I. Kinoshita, R. Takada, Y. Teki and H. Hashimoto, *Inorg. Chem.*, 2012, **51**, 766–768.
